# Supplementary material for: Effect of the geometry of precursor crucibles on the growth of MoS2 flakes by chemical vapor deposition
Source: Royal Society of Chemistry journal article supplement (doi:10.1039/d0nj05486k), 2020-01-01
Supplement: d0nj05486k1.pdf [file d0nj05486k1.pdf]

## Supporting Information

### Effect of geometry of precursor crucibles on the growth of MoS<sub>2</sub> flakes by chemical vapor deposition

*Jinlei Wei<sup>1,2</sup>, Jing-Kai Huang<sup>2</sup>, Jianhao Du<sup>2</sup>, Baoan Bian<sup>1\*</sup>, Sean Li<sup>2</sup>, Danyang Wang<sup>2\*</sup>*

<sup>1</sup>School of Science, Jiangnan University, Wuxi 214122, China

<sup>2</sup>School of Materials Science and Engineering, University of New South Wales,  
Sydney, NSW 2502, Australia

\*[dy.wang@unsw.edu.au](mailto:dy.wang@unsw.edu.au)

\*[baoanbian@jiangnan.edu.cn](mailto:baoanbian@jiangnan.edu.cn)

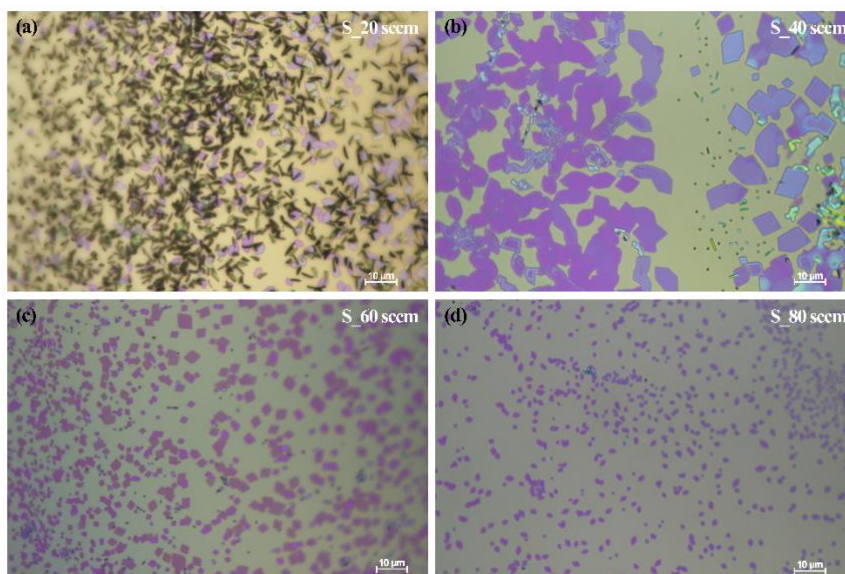

**Fig. S1.** OM images of deposits obtained with S crucibles at different Ar gas flow rates. (a) 20 sccm, (b) 40 sccm, (c) 60 sccm and (d) 80 sccm.

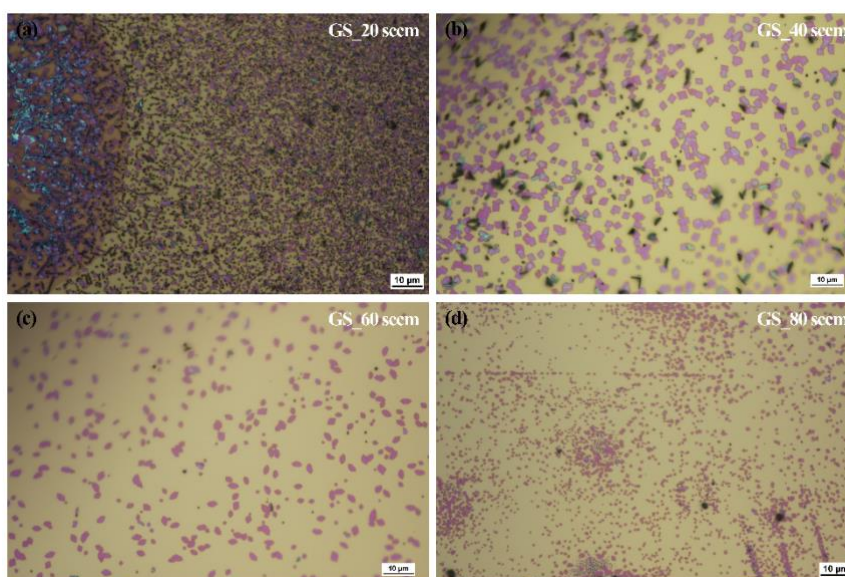

**Fig. S2.** OM images of deposits obtained with GS crucibles at different Ar gas flow rates. (a) 20 sccm, (b) 40 sccm, (c) 60 sccm and (d) 80 sccm.

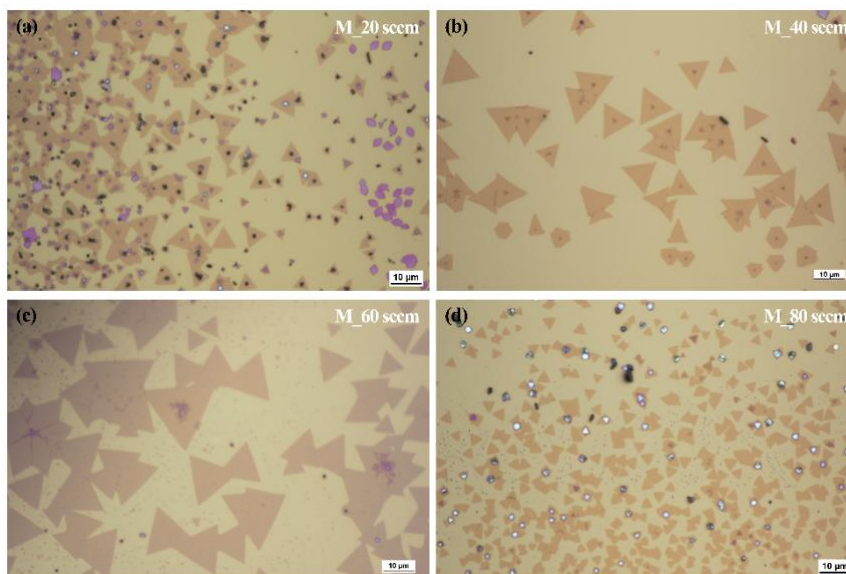

**Fig. S3.** OM images of deposits obtained with M crucibles at different Ar gas flow rates. (a) 20 sccm, (b) 40 sccm, (c) 60 sccm and (d) 80 sccm.

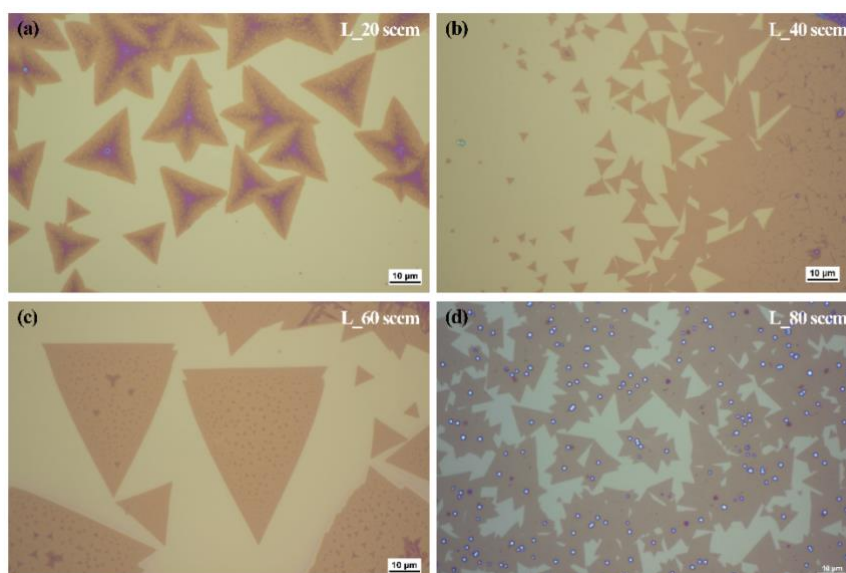

**Fig. S4.** OM images of deposits obtained with L crucibles at different Ar gas flow rates. (a) 20 sccm, (b) 40 sccm, (c) 60 sccm and (d) 80 sccm.
